# Supplementary material
Source: publisher site journal article supplement (https://www.dovepress.com/article/579598)
Supplement: Supplementary file 1 [file 579598%20Revised%20Supplementary%20Material.docx]

**Figure S1.**

**
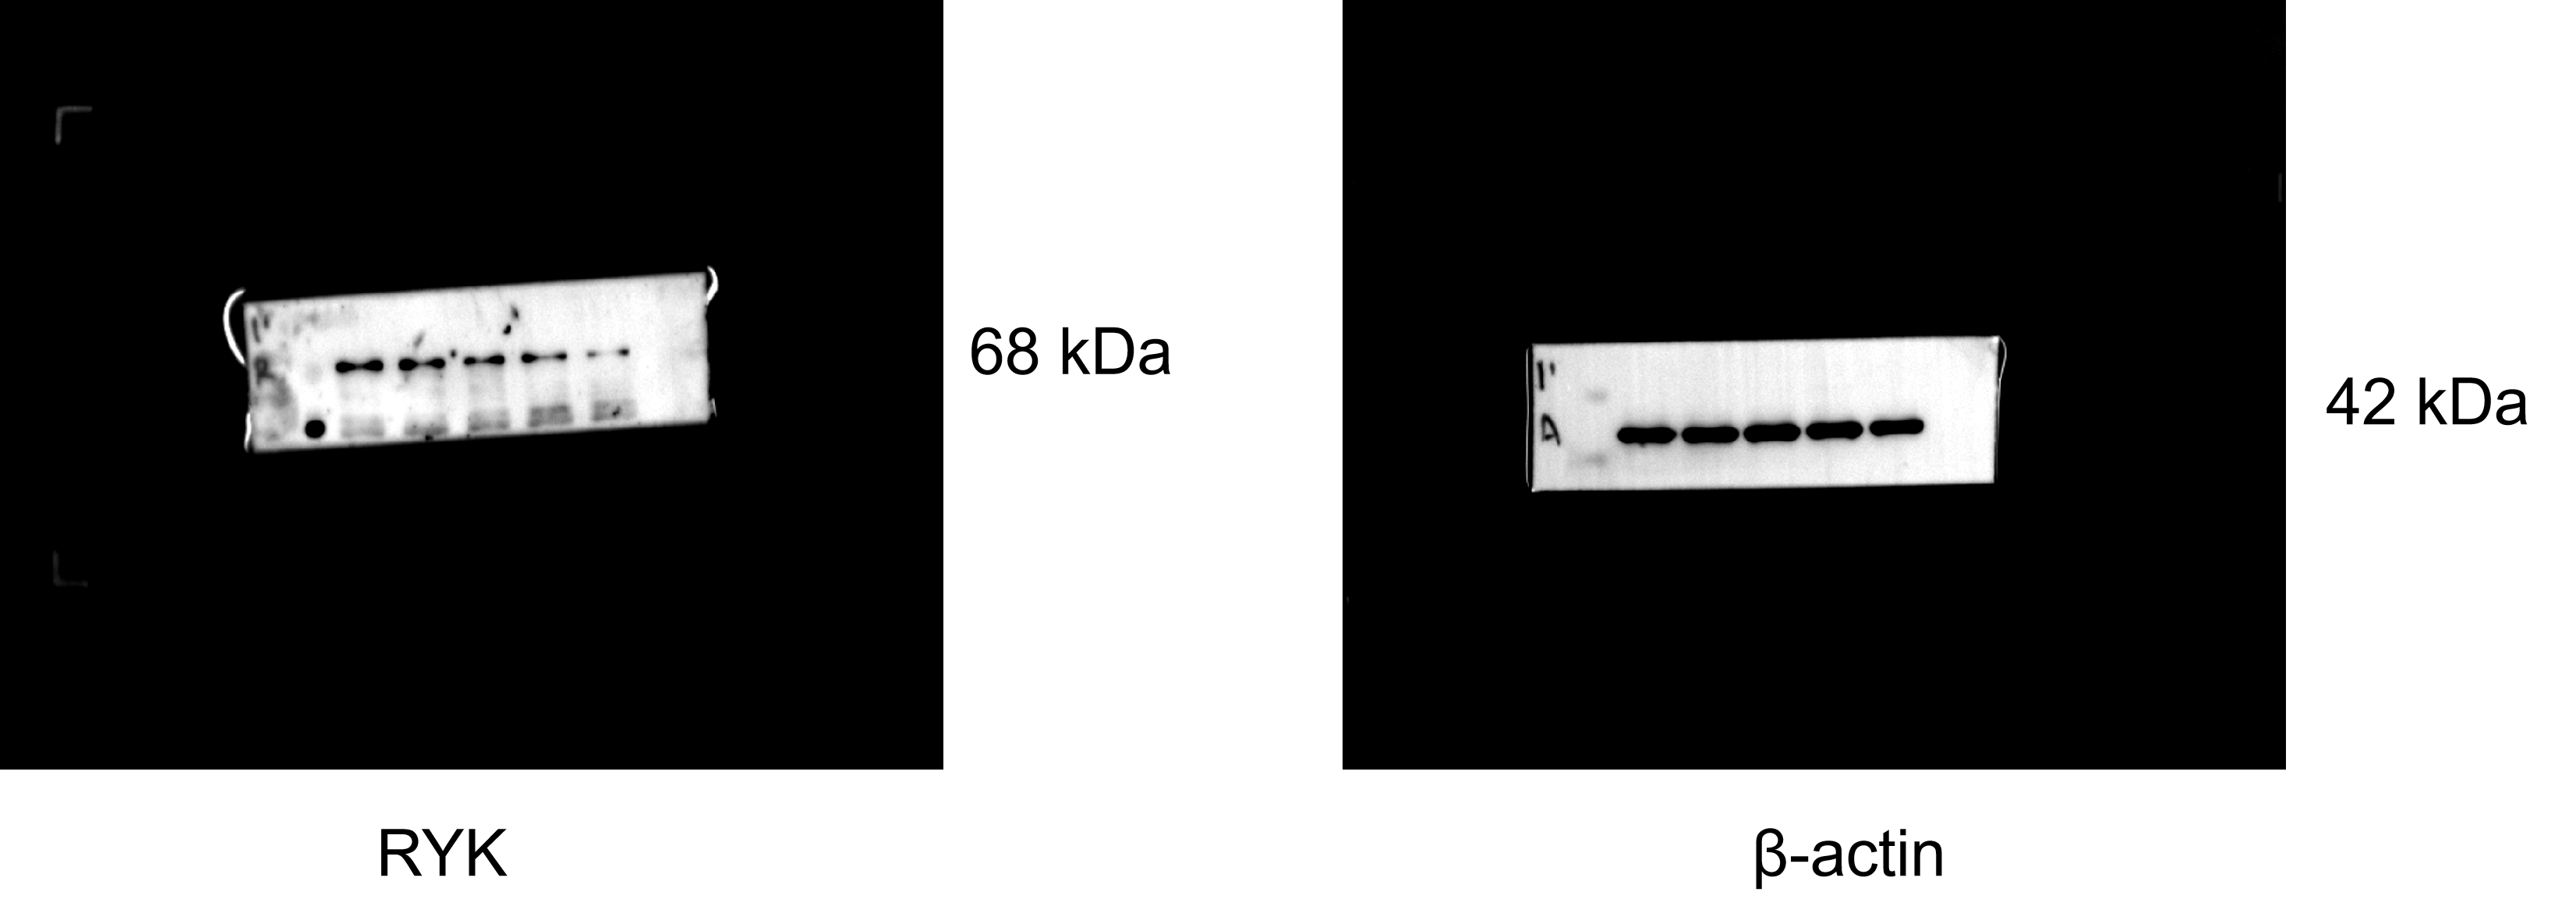
**

**Figure S1** The unprocessed original full blot/gel images of Figure 1B.

**Figure S2.**


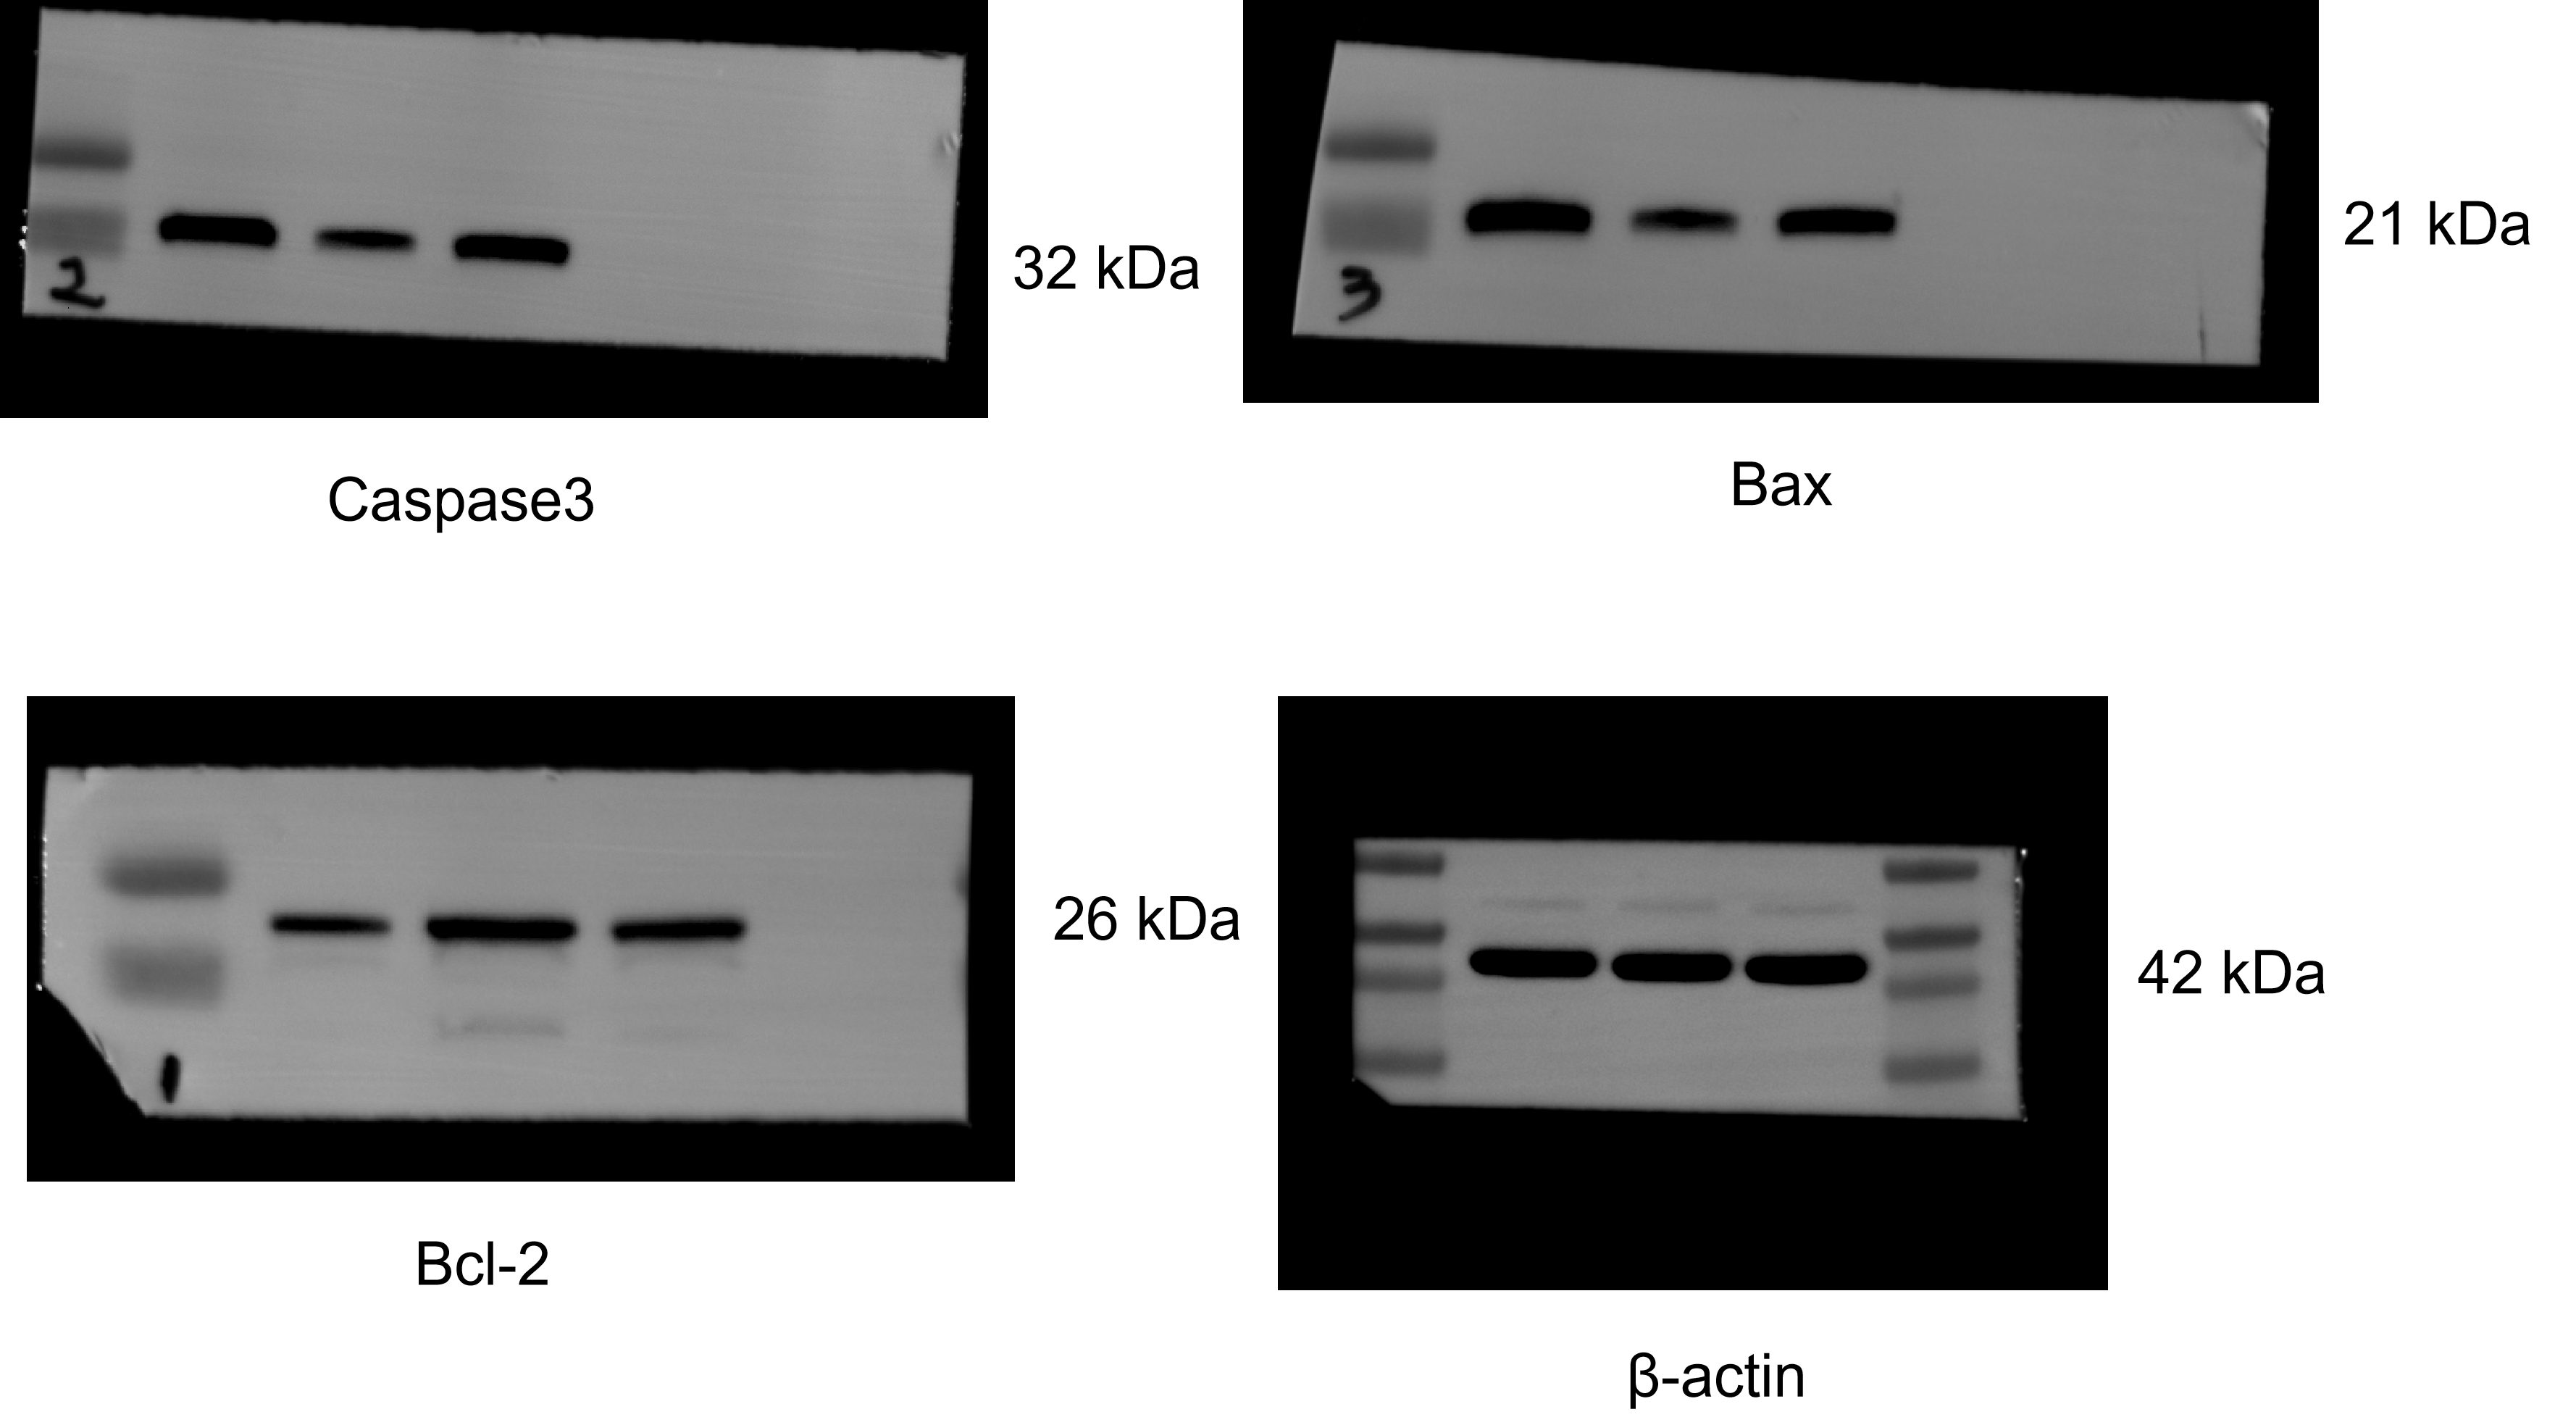


**Figure S2** The unprocessed original full blot/gel images of Figure 2C.

**Figure S3.**


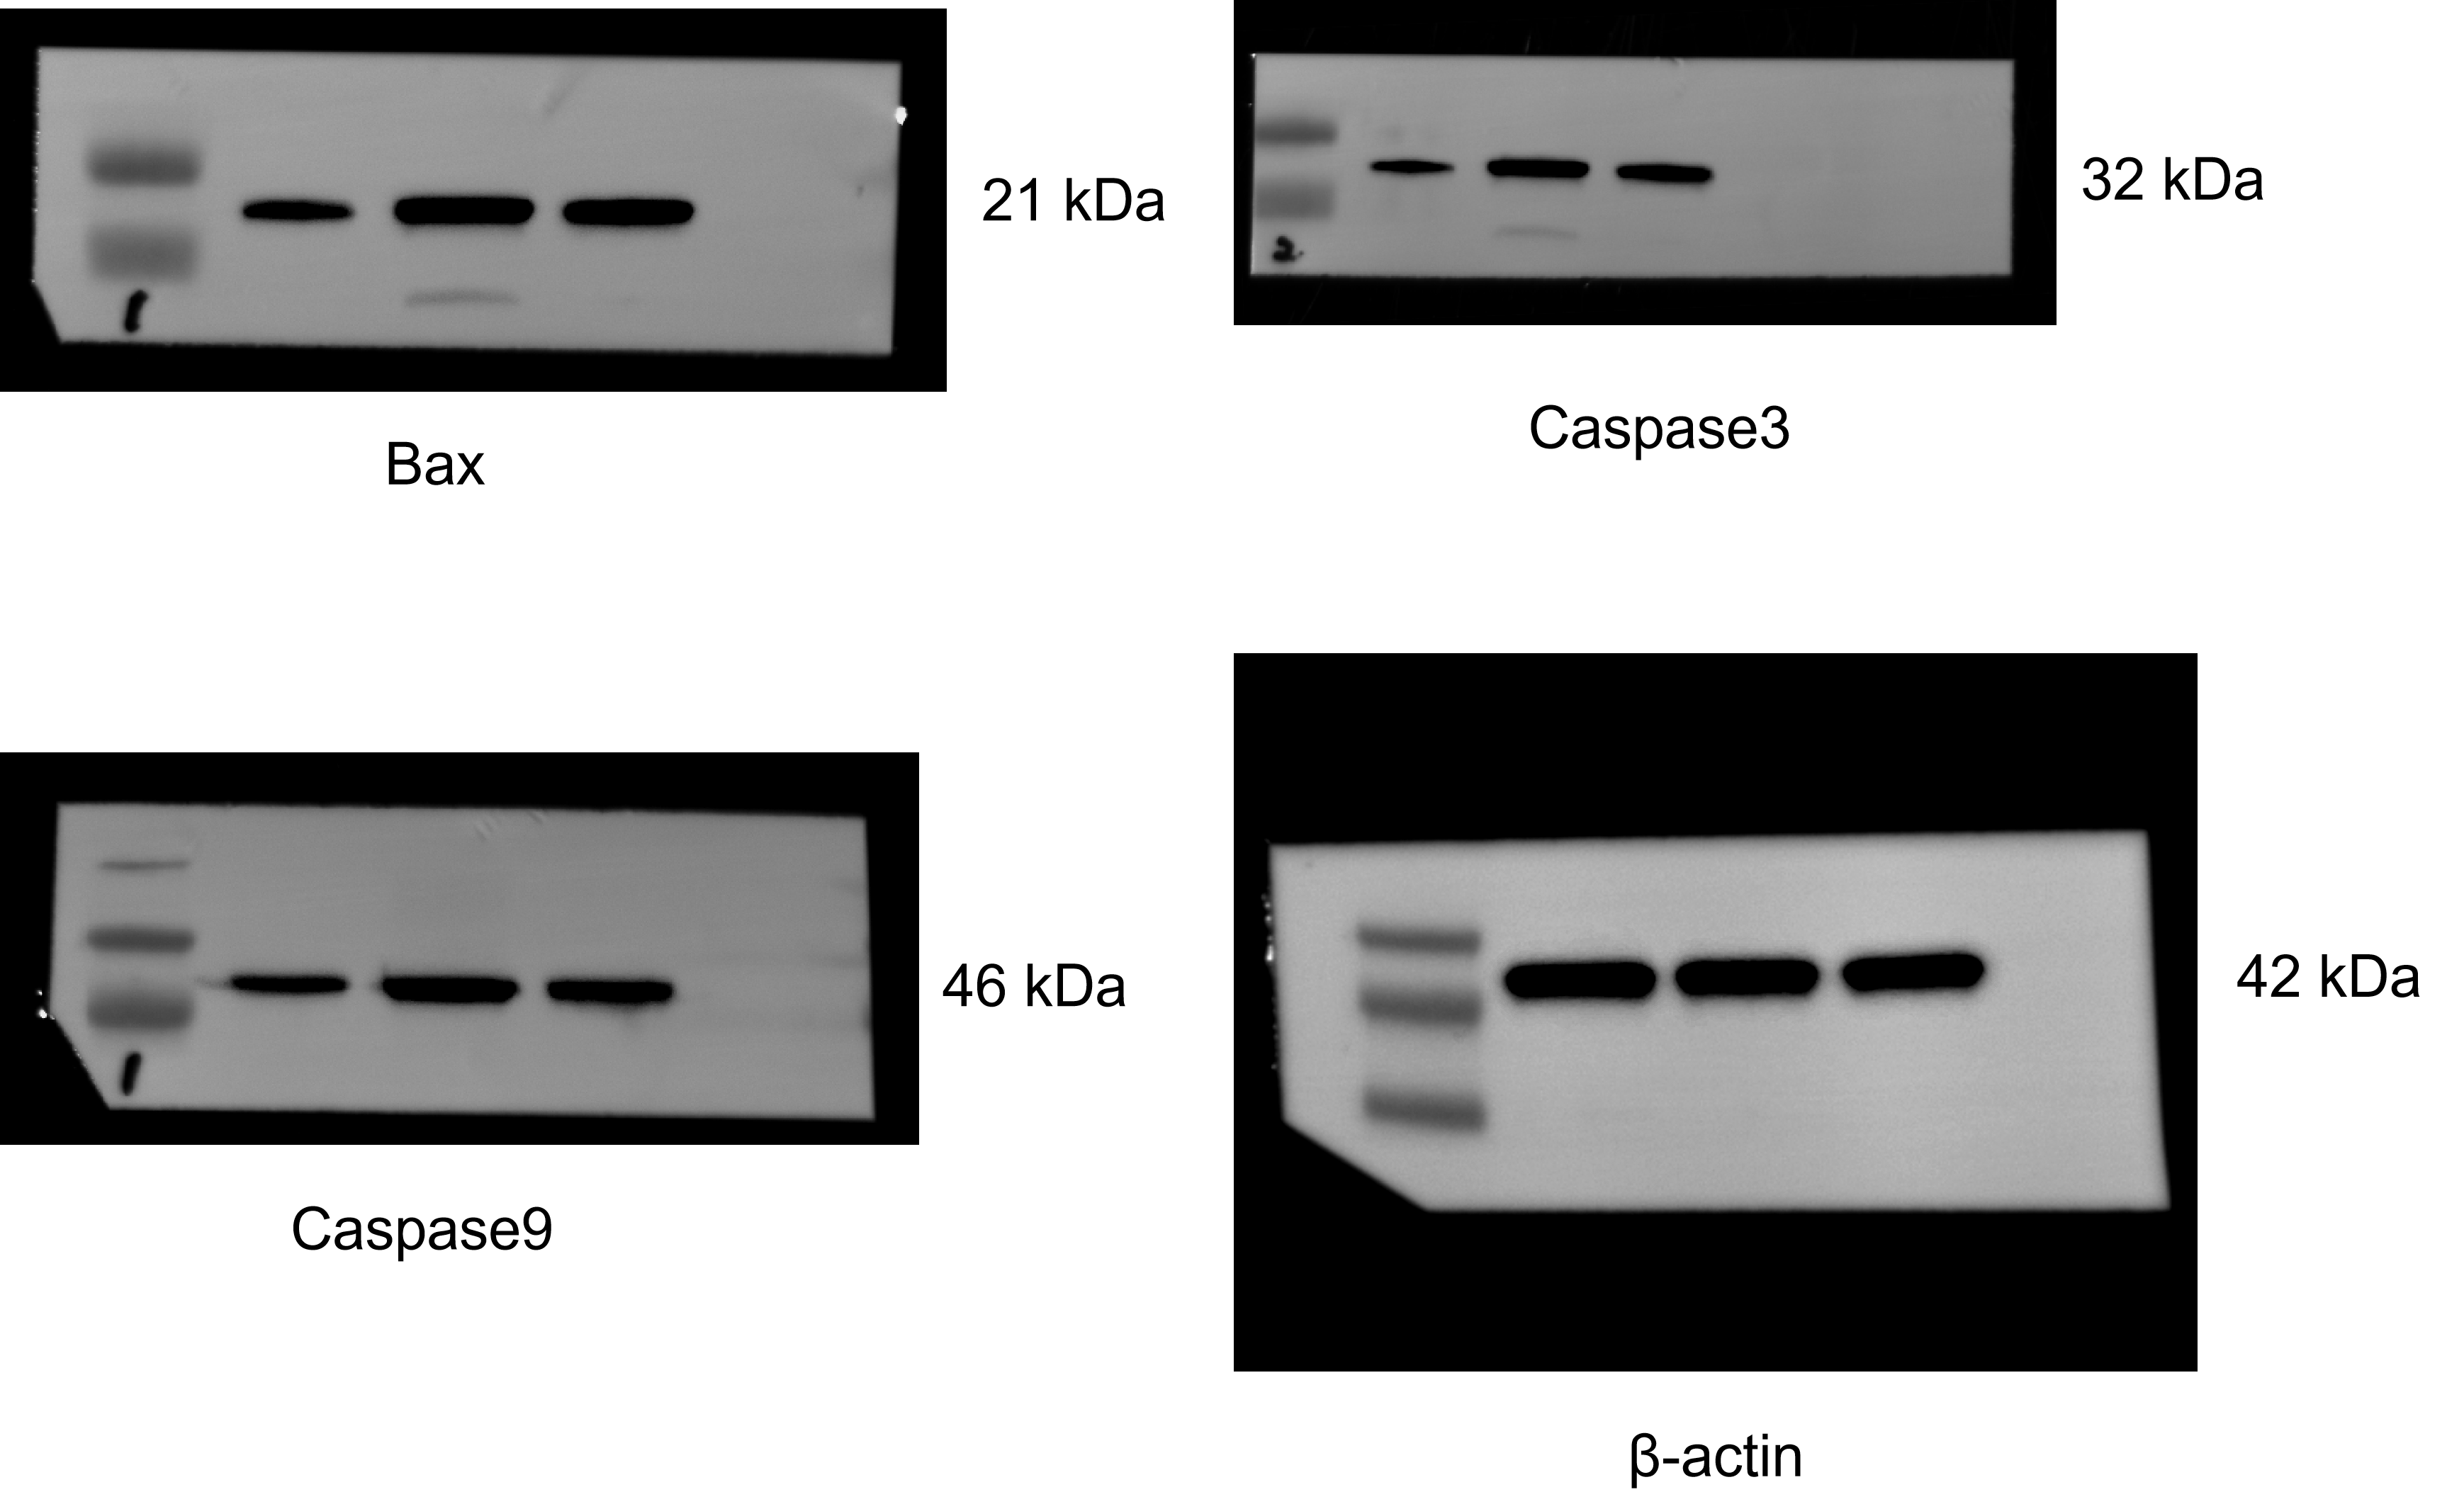


**Figure S3** The unprocessed original full blot/gel images of Figure 5C.
